# Supplementary material for: Integrated Hypoxia Signaling and Oxidative Stress in Developmental Neurotoxicity of Benzo[a]Pyrene in Zebrafish Embryos
Source: MDPI journal article supplement (doi:10.3390/antiox9080731), 2020-08-11
Supplement: s1 [file s1]

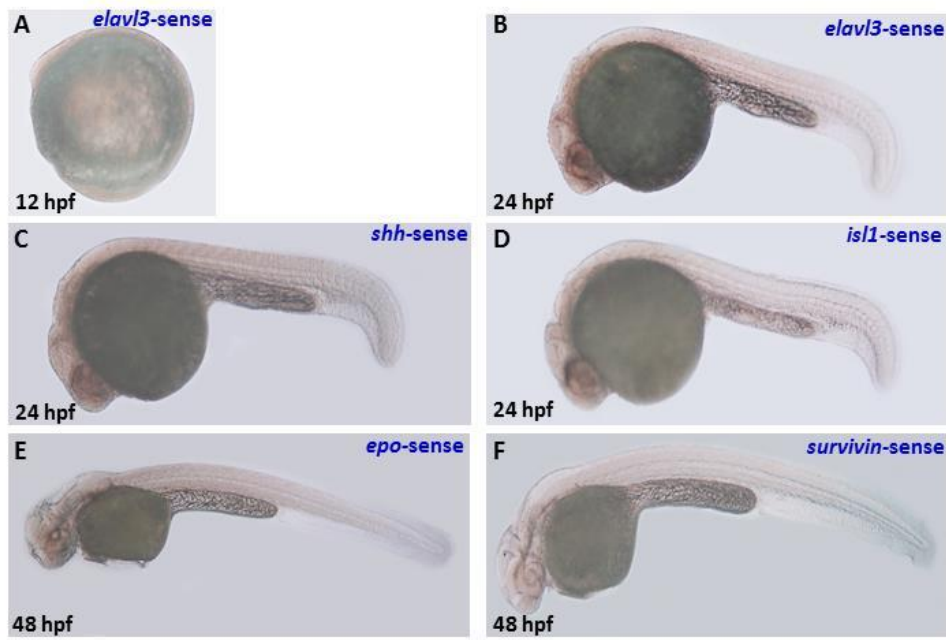

Figure S1. Sense riboprobe serves as negative controls for in situ hybridization staining assay.

In situ hybridization staining with gene-specific sense riboprobe was performed to show the specificity of (A, B) *elavl3* in 12 and 24 hpf embryos; (C) *shh* and (D) *isl1* in 24 hpf embryos; and (E) *epo* and (F) *survivin* in 48 hpf. No background staining signal was presented in all embryos.
